# Supplementary material for: Multiple Genetic Alterations within the PI3K Pathway Are Responsible for AKT Activation in Patients with Ovarian Carcinoma
Source: PLoS One. 2013 Feb 7;8(2):e55362. doi: 10.1371/journal.pone.0055362 (PMC3567053; doi:10.1371/journal.pone.0055362)
Supplement: Table S10 — Correlation between alterations in the expression of PTEN, PIK3CA, AKT1 and AKT2 and pAKT status in E-OC. (DOC) [file pone.0055362.s014.doc]

**Table S10. Correlation between alterations in the expression of PTEN, PIK3CA, AKT1 and AKT2 and pAKT status in E-OC.**

| **Alteration** | **pAKT negative (N=2)** | **pAKT positive (N=14)** |
| --- | --- | --- |
| AKT1 **a** | 0 | 0 |
| AKT2 **b** | 0 | 0 |
| PIK3CA **c** | 0 | 3 |
| PTEN **d** | 1 | 2 |
| AKT1, PTEN | 0 | 0 |
| AKT2, PTEN | 0 | 0 |
| PIK3CA, PTEN | 0 | 1 |
| AKT1, AKT2 | 0 | 0 |
| PIK3CA, AKT1 | 0 | 1 |
| PIK3CA, AKT2 | 0 | 1 |
| AKT1, AKT2, PTEN | 0 | 0 |
| AKT1, PIK3CA, PTEN | 0 | 0 |
| AKT2, PIK3CA, PTEN | 0 | 0 |
| AKT1, AKT2, PIK3CA | 0 | 2 |
| AKT1, AKT2, PIK3CA, PTEN | 0 | 0 |

**a** High AKT1 expression as defined in the manuscript.

**b** High AKT2 expression as defined in the manuscript.

**c** High PIK3CA expression as defined in the manuscript.

**d** PTEN loss as defined in the manuscript.
